# Supplementary material for: Insights into the catalytic mechanism of dTDP-glucose 4,6-dehydratase from quantum mechanics/molecular mechanics simulations
Source: Royal Society of Chemistry journal article supplement (doi:10.1039/c4ra04406a), 2014-07-30

## Insights into the Catalytic Mechanism of dTDP-Glucose 4,6-Dehydratase from Quantum Mechanics/Molecular Mechanics Simulations

Guangcai Ma<sup>1</sup>, Lihua Dong<sup>1,2</sup>, Yongjun Liu<sup>1\*</sup>

<sup>1</sup>School of Chemistry and Chemical Engineering, Shandong University, Jinan, Shandong 250100, China

<sup>2</sup>School of Chemistry and Chemical Engineering, Qilu Normal University, Jinan, Shandong 250013, China

**Table 1** Calculated QM/MM absolute and relative energies for all reaction species.

|                         | <i>Single-point energies E (a.u.)</i> | <i>Entropic contributions S (J/mol/K)</i> | <i>TΔS (kcal/mol)</i> | <i>Relative energies ΔE<sup>a</sup> (kcal/mol)</i> | <i>Relative energies ΔG<sup>b</sup> (kcal/mol)</i> |
|-------------------------|---------------------------------------|-------------------------------------------|-----------------------|----------------------------------------------------|----------------------------------------------------|
| <b>R</b>                | -2573.52451                           | 471.25                                    | 0.0                   | 0.0                                                | 0.0                                                |
| <b>(R')<sup>c</sup></b> | (-2748.25695)                         | (542.41)                                  | 0.0                   | (0.0)                                              | (0.0)                                              |
| <b>TS1</b>              | -2573.49151                           | 465.99                                    | -0.4                  | 20.7                                               | 21.1                                               |
| <b>(TS1')</b>           | (-2748.22439)                         | (530.03)                                  | -0.5                  | (20.4)                                             | (20.9)                                             |
| <b>IM1</b>              | -2573.53011                           | 481.20                                    | 0.7                   | -3.5                                               | -4.2                                               |
| <b>(IM1')</b>           | (-2748.26205)                         | (553.40)                                  | 0.8                   | (-3.2)                                             | (-4.0)                                             |
| <b>TS2</b>              | -2573.50865                           | 477.51                                    | 0.5                   | 10.0                                               | 9.5                                                |
| <b>IM2</b>              | -2573.52466                           | 483.24                                    | 0.8                   | -0.1                                               | -0.9                                               |
| <b>TS3</b>              | -2573.51533                           | 480.95                                    | 0.7                   | 5.8                                                | 5.1                                                |
| <b>IM3</b>              | -2573.52950                           | 493.88                                    | 1.7                   | -3.1                                               | -4.8                                               |
| <b>TS4</b>              | -2573.51204                           | 487.94                                    | 1.2                   | 7.8                                                | 6.6                                                |
| <b>P'</b>               | -2573.54924                           | 481.67                                    | 0.8                   | -15.5                                              | -16.3                                              |
| <b>TS'</b>              | -2573.48713                           | 483.00                                    | 0.9                   | 23.5                                               | 22.6                                               |
| <b>P''</b>              | -2573.51313                           | 488.94                                    | 1.2                   | 7.1                                                | 5.9                                                |

<sup>a</sup> Relative single-point energies. <sup>b</sup> Relative Gibbs free energies,  $\Delta G = \Delta E - T\Delta S$ .

<sup>c</sup> Compared with R, the Lys155 was added to QM-region of R'.

**Figure S1** Time dependence of RMSD ( $\text{\AA}$ ) from 15 ns MD simulation.

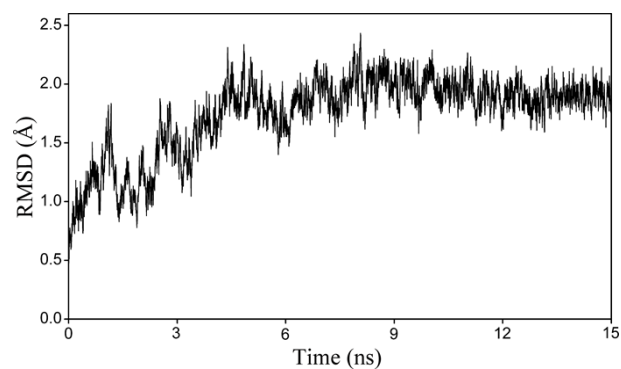

**Figure S2** The superposition of the active sites of 11 optimized geometries. These structures were taken firstly from the snapshots of MD trajectories at intervals of 200 ps from 13 ns to 15 ns, and then optimized by QM/MM method at the B3LYP/6-31G(d,p)//CHARMM22 level. For clarity, the atoms included in QM region are shown in sticks.

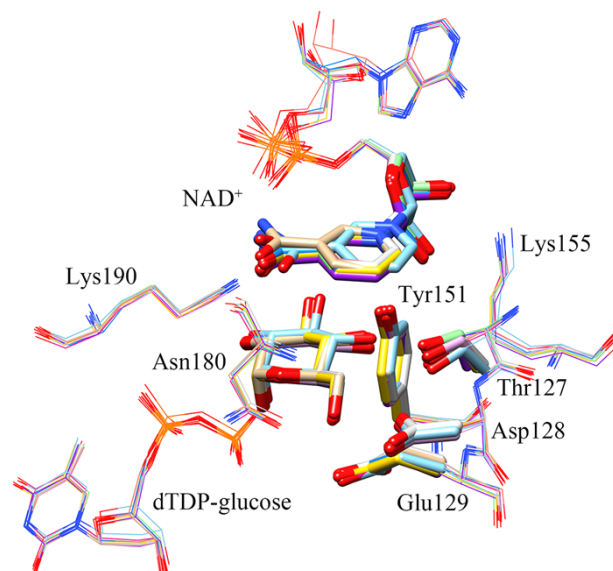

**Figure S3** Optimized structures of reactant (R), transition state (TS) and product (P) for the four different enol-keto tautomerization models. Distances are given in Å.

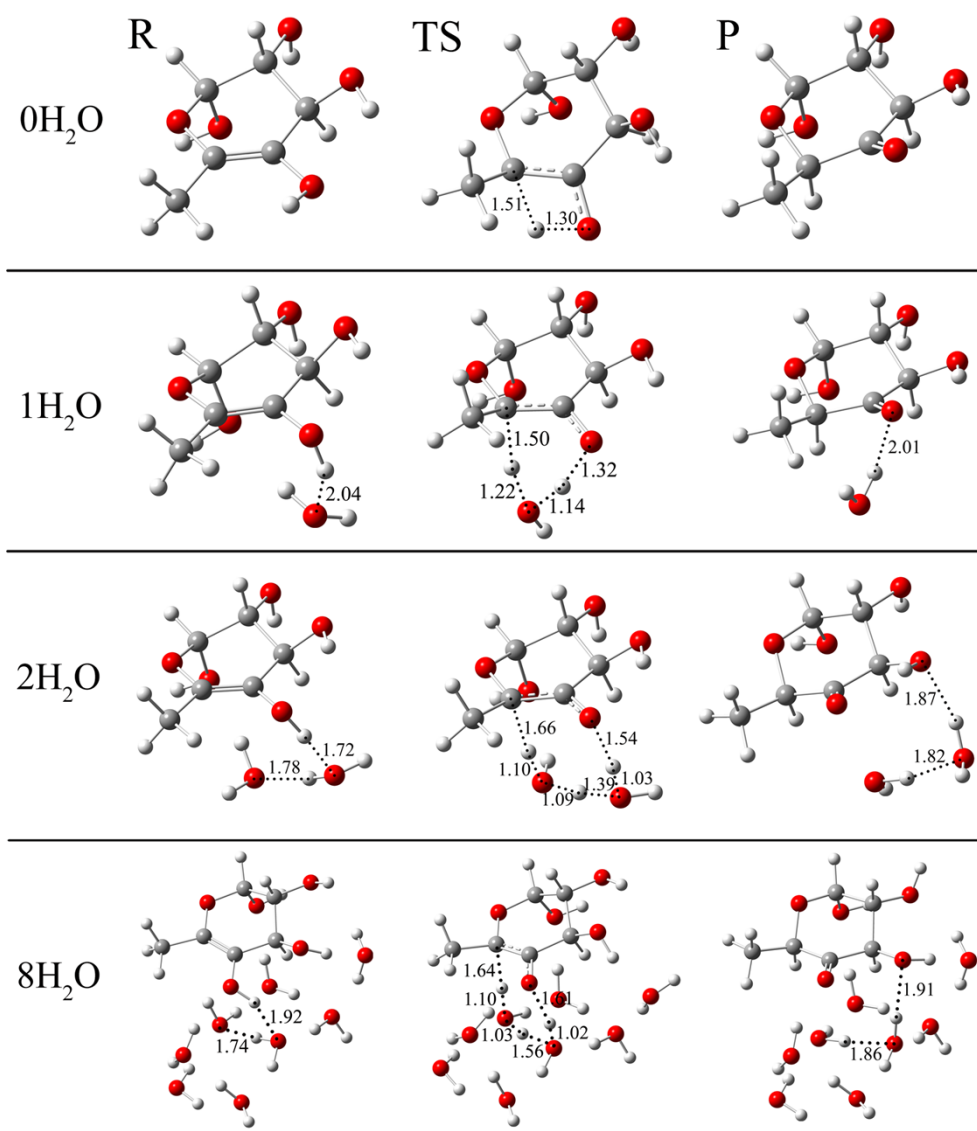

Supplement: c4ra04406a1.pdf [file c4ra04406a1.pdf]
